# Supplementary material for: Towards the systematic reconnaissance of seismic signals from glaciers and ice sheets – Part B: Unsupervised learning for source process characterisation
Source: Copernicus journal article supplement (doi:10.5194/egusphere-2023-1341), 2023-07-25
Supplement: Supplementary file 1 [file egusphere-2023-1341-supplement.pdf]

# Towards the systematic reconnaissance of seismic signals from glaciers and ice sheets - Part B: Unsupervised learning for source process characterisation: Supplementary Materials

Rebecca B. Latto<sup>1</sup>, Ross J. Turner<sup>1</sup>, Anya M. Reading<sup>1</sup>, Sue Cook<sup>2</sup>, Bernd Kulesa<sup>3</sup> and J. Paul Winberry<sup>4</sup>

5 <sup>1</sup>School of Natural Sciences (Physics), University of Tasmania, Private Bag 37, Hobart, 7001, Australia

<sup>2</sup>Australian Antarctic Program Partnership, Institute for Marine and Antarctic Studies, 20 Castray Esplanade, Battery Point TAS 7004, Australia

<sup>3</sup>Glaciology Group, College of Science, Swansea University, Singleton Park, Swansea SA2 8PP, UK

<sup>4</sup>Department of Geological Sciences, Central Washington University, Ellensburg, WA, USA

## 10 **Table of Contents**

### **1) Supplement to main text**

**Table S1:** Overview of features and transformations

**Figure S1:** Distribution of each feature in the feature dataset after log or linear scaling and normalization

**Table S2:** Descriptions of feature pairs

15 **Figure S2:** Relationships between each feature pair

**Section S3:** Quantitative approaches to the number of clusters

**Figure S3:** Similarity-based metrics for determining an optimized value of  $k$

**Figure S4:** Screenshot of the manual appraisal GUI built and operated through MATLAB

**Figure S5:** Manual appraisal of the reference event catalogue showing high confidence events only

20 **Table S3:** Summary of signal types expected from a cryoseismic deployment

**Figure S6:** Illustration of how clusters (depicted as circles) evolve in composition from  $k=2$  (top row) to  $k=14$  (bottom row) showing high confidence events only

**Figure S7:** Distributions of features within each cluster for  $k = 10$

**Table S4:** Reference for the spatial attribution discussed in main text (Table 1; Fig. 6).

25 **Figure S8:** Reference for the temporal attribution of clusters

**Figure S9:** The spatial and temporal attribution of clusters for  $k=10$  showing high confidence events only.

**Figure S10:** Stability of cluster results compared with the standard procedure showing high confidence events only

**Table S5:** Explanations for most discriminant feature as most negative or most positive in a distribution

**Table S6:** Cluster attribution for  $k = 10$

30 **Figure S11:** Synthesis of the Whillans Ice Stream duration and frequency relationships by manually identified event types and unsupervised learning clusters showing high confidence events only

## 2) Electronic Supplements

Supplementary files related to material presented in the main text are publicly available in [https://github.com/beccalatto/multi\\_sta\\_lta/unsupervised\\_learning\\_for\\_cryoseismology/](https://github.com/beccalatto/multi_sta_lta/unsupervised_learning_for_cryoseismology/).

35 File names and description are listed below.

**TraceFeatureDatasetWhillans.csv** : Trace feature dataset for the Whillans Ice Stream

**ReferenceFeatureDatasetWhillans.csv** : Reference feature dataset for the Whillans Ice Stream

**ReferenceClusterLabelsWhillans\_k10.csv** : Reference event catalogue with reference features and a column for the cluster label from k-means++ applied to data from the Whillans Ice Stream, for  $k=10$

Table S1: Overview of features and transformations. Provided are the method of computation for each reference feature, in terms of log or linear scaling applied to the feature derived from the top three seismometers or similar (middle column) and traces used in feature calculation (right column). First, the energy of each trace is calculated as an integral of the trace. Then, each reference feature per event is calculated from the three seismometers with the highest energy detections of the event that detected that event such that the reference feature best characterizes the event's corresponding waveform.

| <b>Feature description [tag]</b>                                    | <b>Log or linear</b> | <b>Trace(s) used in feature calculation</b>                        |
|---------------------------------------------------------------------|----------------------|--------------------------------------------------------------------|
| Number of stations that detect an event [0]                         | Linear               | All                                                                |
| Duration [1]                                                        | Log                  | Reference event catalogue (handles travel time)                    |
| Ratio of the mean over the maximum of the envelop signal [2]        | Linear               | Median of the 3 most energetic traces                              |
| Ratio of the median over the maximum of the envelop signal [3]      | Linear               | Median of the 3 most energetic traces                              |
| Ratio between ascending and descending time [4]                     | Log                  | Median of the 3 most energetic traces                              |
| Kurtosis of the raw signal (peakness of the signal) [5]             | Log                  | Median of the 3 most energetic traces                              |
| Kurtosis of the envelop [6]                                         | Log                  | Median of the 3 most energetic traces                              |
| Skewness of the raw signal [7]                                      | Log                  | Median of the 3 most energetic traces                              |
| Skewness of the envelop [8]                                         | Log                  | Median of the 3 most energetic traces                              |
| Energy in the first third part of the autocorrelation function [10] | Log                  | Median of the 3 most energetic traces                              |
| Energy in the remaining part of the autocorrelation function [11]   | Log                  | Median of the 3 most energetic traces                              |
| Energy of the signal filtered in 0.001 - 0.03 Hz [13]               | Log                  | 2nd most energetic trace in this frequency band                    |
| Energy of the signal filtered in 0.01 - 0.3 Hz [14]                 | Log                  | 2nd most energetic trace in this frequency band                    |
| Energy of the signal filtered in 0.1 - 3 Hz [15]                    | Log                  | 2nd most energetic trace in this frequency band                    |
| Energy of the signal filtered in 1 - 30 Hz [16]                     | Log                  | 2nd most energetic trace in this frequency band                    |
| Energy of the signal filtered in 10 - 100 Hz [17]                   | Log                  | 2nd most energetic trace in this frequency band                    |
| Kurtosis of the signal filtered in above 5 frequency bands [18–22]  | Log                  | Median of 3 most energetic traces computed for each frequency band |
| Mean of the discrete Fourier transform [24]                         | Log                  | Median of the 3 most energetic traces                              |
| Max of the discrete Fourier transform [25]                          | Log                  | Median of the 3 most energetic traces                              |
| Central frequency of the 1st quartile [27]                          | Linear               | Median of the 3 most energetic traces                              |
| Central frequency of the 2nd quartile [28]                          | Linear               | Median of the 3 most energetic traces                              |
| Median of the normalized discrete Fourier transform [29]            | Linear               | Median of the 3 most energetic traces                              |
| Variance of the normalized discrete Fourier transform [30]          | Log                  | Median of the 3 most energetic traces                              |

|                                               |        |                                          |
|-----------------------------------------------|--------|------------------------------------------|
| Energy in $[0, 1/4]$ Nyquist frequency [34]   | Log    | 2nd most energetic trace across spectrum |
| Energy in $[1/4, 1/2]$ Nyquist frequency [35] | Log    | 2nd most energetic trace across spectrum |
| Energy in $[1/2, 3/4]$ Nyquist frequency [36] | Log    | 2nd most energetic trace across spectrum |
| Energy in $[3/4, 1]$ Nyquist frequency [37]   | Log    | 2nd most energetic trace across spectrum |
| Spectral centroid [38]                        | Linear | Median of the 3 most energetic traces    |
| Gyration radius [39]                          | Linear | Median of the 3 most energetic traces    |
| Spectral centroid width [40]                  | Linear | Median of the 3 most energetic traces    |
| Rectilinearity [68]                           | Linear | Median of the 3 most energetic traces    |
| Dip [70]                                      | Linear | Median of the 3 most energetic traces    |
| Planarity [71]                                | Linear | Median of the 3 most energetic traces    |

---

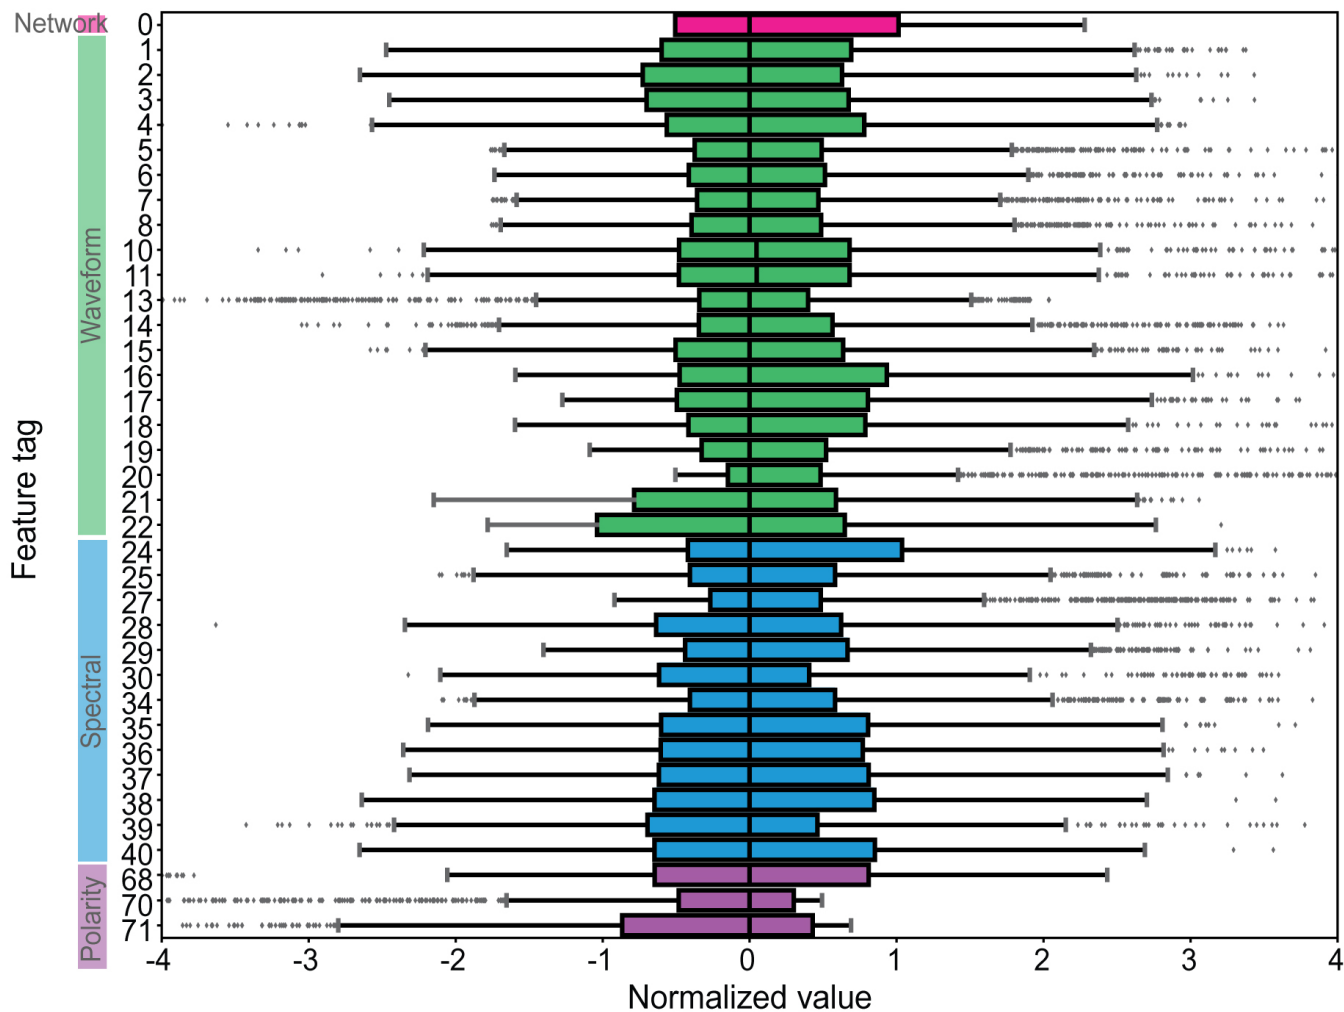

**Figure S1.** Distribution of each feature in the feature dataset after log or linear scaling and normalization. The feature tags and color attributions (top to bottom: pink, green, blue, and purple) correspond to the numerical tag per feature and feature type provided in Table S1.

Table S2: Descriptions of feature pairs where the correlation  $r \geq 0.95$ , as well as which feature is eliminated from the cluster analysis implemented here and the reasoning.

| Feature tag | Correlated feature tag ( $> 0.95$ ) | Feature to keep | Reasoning                                                                                                |
|-------------|-------------------------------------|-----------------|----------------------------------------------------------------------------------------------------------|
| 2           | 3                                   | 3               | Median more robust metric than mean                                                                      |
| 5           | 6                                   | 5               | Prefer metric for raw waveform than envelope                                                             |
| 5           | 7                                   | 5               | Get rid of skewness (kurtosis essentially equivalent)                                                    |
| 5           | 8                                   | 5               | Get rid of skewness (kurtosis essentially equivalent)                                                    |
| 6           | 7                                   | Neither         | Reasons above                                                                                            |
| 6           | 8                                   | Neither         | Reasons above                                                                                            |
| 7           | 8                                   | Neither         | Reasons above                                                                                            |
| 10          | 11                                  | 10              | More reasonable to keep first 1/3 of the autocorrelation function than that remaining part               |
| 25          | 34                                  | 34              | 25 reports same finding as 34 and for consistency, want to keep all of the same set of features 34 to 37 |
| 35          | 36                                  | Both            | Though highly correlated, reasonable variance in the relationship                                        |
| 35          | 37                                  | Both            | Though highly correlated, reasonable variance in the relationship                                        |
| 36          | 37                                  | Both            | Though highly correlated, reasonable variance in the relationship                                        |
| 38          | 40                                  | 38              | More meaningful to keep spectral centroid value than width                                               |

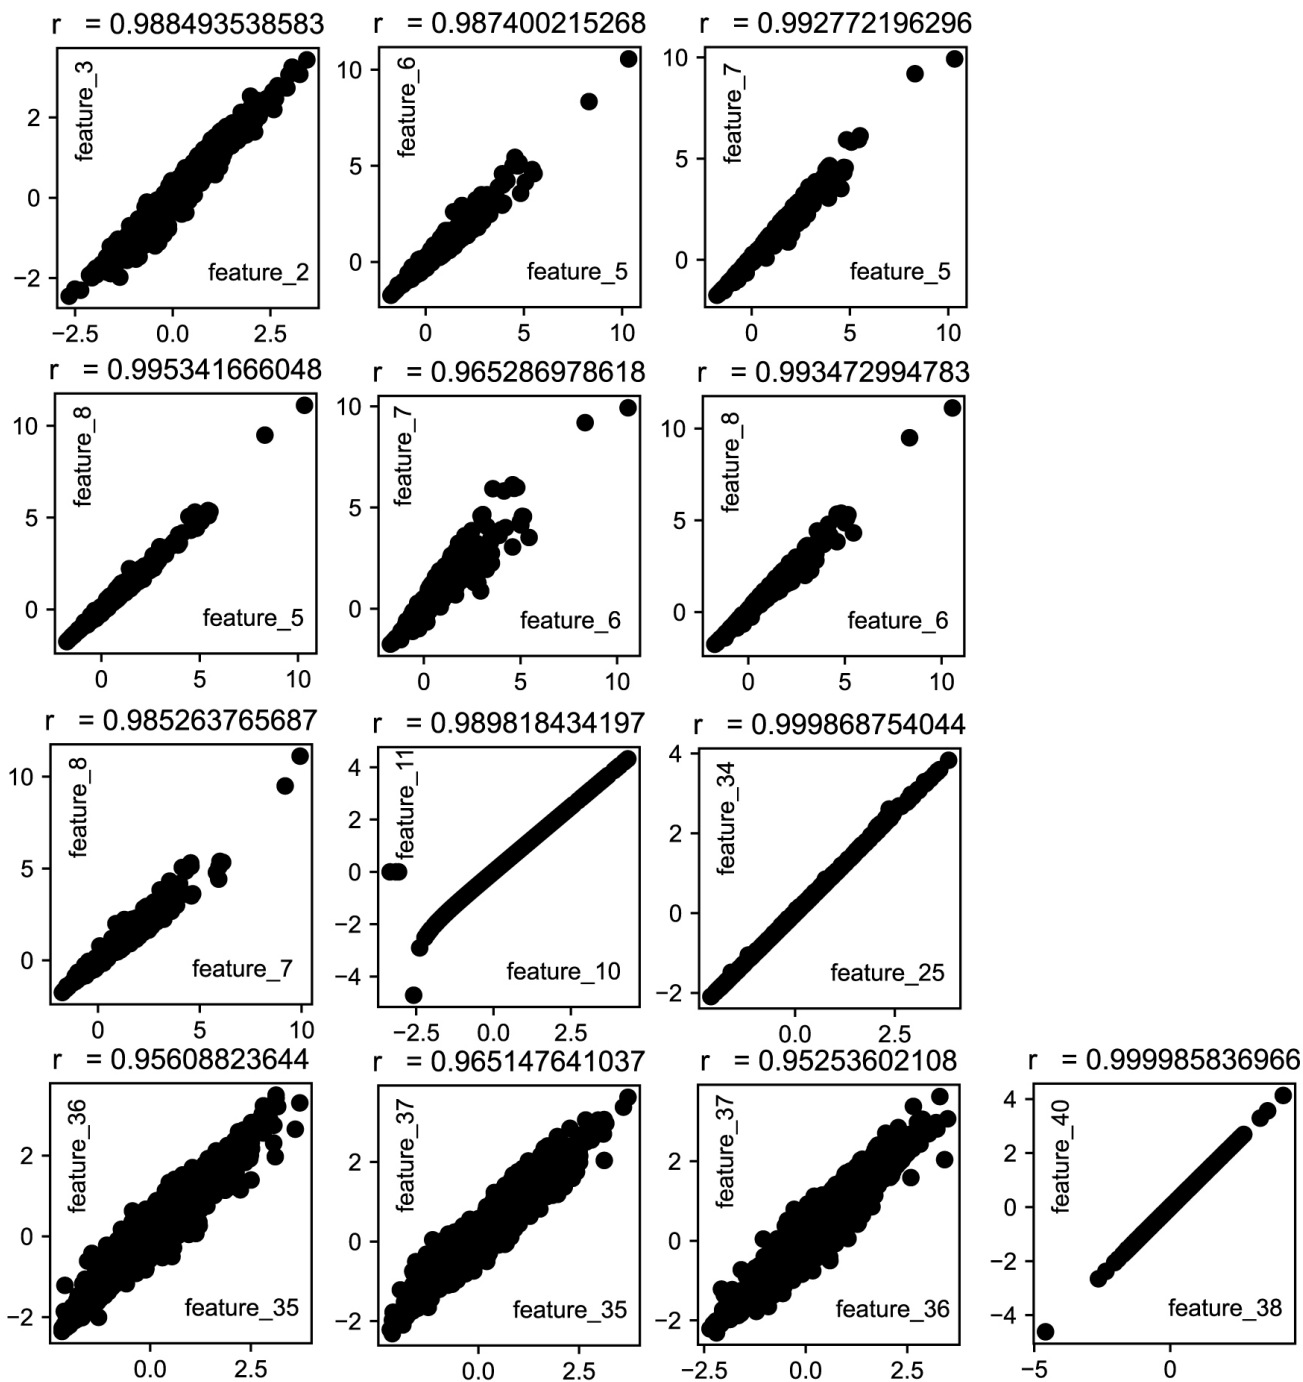

**Figure S2.** Relationships between each feature pair where the correlation is greater or equal to  $r \geq 0.95$ . Scatter plot depiction contributes to discussion of the similarities or variance between two features' distributions, used to determine which features to remove or keep in the clustering analysis.

### 40 S3.3 Quantitative approaches to the number of clusters

The following supplemental section is provided to further the discussion in the main text in Sect. 3.3 on how the number of clusters ( $k$ ) are prescribed in our k-means++ semi-automated implementation. Below, we explore potential optimized choices of  $k$  based on quantitative metrics.

We first consider the Silhouette test, which is a commonly used assessment of cluster separation (Rousseeuw, 1987). For each  $k$  from 2 to 29, using an extension of the cluster solutions shown previously up to  $k=14$  (main text, Fig. 5), we show the Silhouette scores weighted by  $k$  (Fig. S3a). For our implementation of k-means++,  $k=14$  is a realistic maximum for the WIS; however, here we provide the results up to  $k=29$  for a more extensive quantitative analysis. To interpret the weighted silhouette scores: scores near zero indicate that clusters may be overlapping (i.e. not well-separated) or points have been added to the wrong cluster. Higher scores indicate that the clusters are well-separated. At  $k=10$ , we note a moderate local maximum in the weighted silhouette score. Though useful, the Silhouette scores have interpretative limitations since we cannot gain insight into how cluster separation scores vary across the high-dimensional feature set.

Therefore, we are motivated to develop a more informative quantitative approach to guide the choice of  $k$ . We calculate the similarity of two clusters at a given  $k$ , based on the overlap of features within each cluster. We define a ‘Similarity Index’ akin to that used in the main text, Sect. 3.1.1. However, instead of computing correlation coefficients for each feature pairwise, we quantify the summation of the intersection between each feature distribution of each pair of clusters (referred to as ‘histogram overlap’; Smith, 1997). Given clusters A and B, the Similarity Index ( $U$ ) is defined here as:

$$U(A,B) = \frac{1}{N} \sum_{j=1}^N \sum_{l=1}^n \min \left( \frac{A_{jl}}{[\text{count of events in A}]}, \frac{B_{jl}}{[\text{count of events in B}]} \right), \quad (\text{S1})$$

where  $n$  is the number of bins (= 100),  $N$  is the number of features in this analysis (= 30), and the notation  $A_{jl}$  and  $B_{jl}$  signifies the count of events in cluster A for feature  $j$  and bin  $l$ . The Similarity Index is scaled by  $N$  and the count number of events in each cluster. Therefore, the maximum Similarity Index is 1 when two clusters are entirely similar (i.e. the 30 features are distributed in the same way between a pair of clusters). The minimum Similarity Index is 0 when two clusters are well-separated (i.e. the 30 features are distributed distinctively between a pair of clusters). In order to produce clusters that are well-separated and thus provide unique information, we are looking for a Similarity Index closest to zero.

We apply this metric to the problem of choosing the number of clusters a priori. For each  $k$  from 2 to 29, we compute the Similarity Index for all pairs of clusters (Fig. S3b). The number of values comprising the Similarity Index per  $k$  equals  $k - 1$ , that is, one pair of clusters to compare for  $k=2$  and two pairs for  $k=3$  and so on. At  $k=10$ , we find a local minimum, in terms of the minimum (bottom ‘whisker’), median (white horizontal line), and maximum (top ‘whisker’) of the range of  $U$ . We note two outliers at  $U=0.7$  and  $U=0.8$ , which signify two pairs of clusters that are more similar than the other pairs of clusters. Another local minimum occurs at  $k=14$ , indicating another potentially reasonable number of clusters for this dataset. However, since the maximum of  $U$  at  $k=14$  is 16% greater (i.e. clusters less separated) than the maximum of  $U$  at  $k=10$  (excluding outlier data), we suggest proceeding with  $k=10$ .



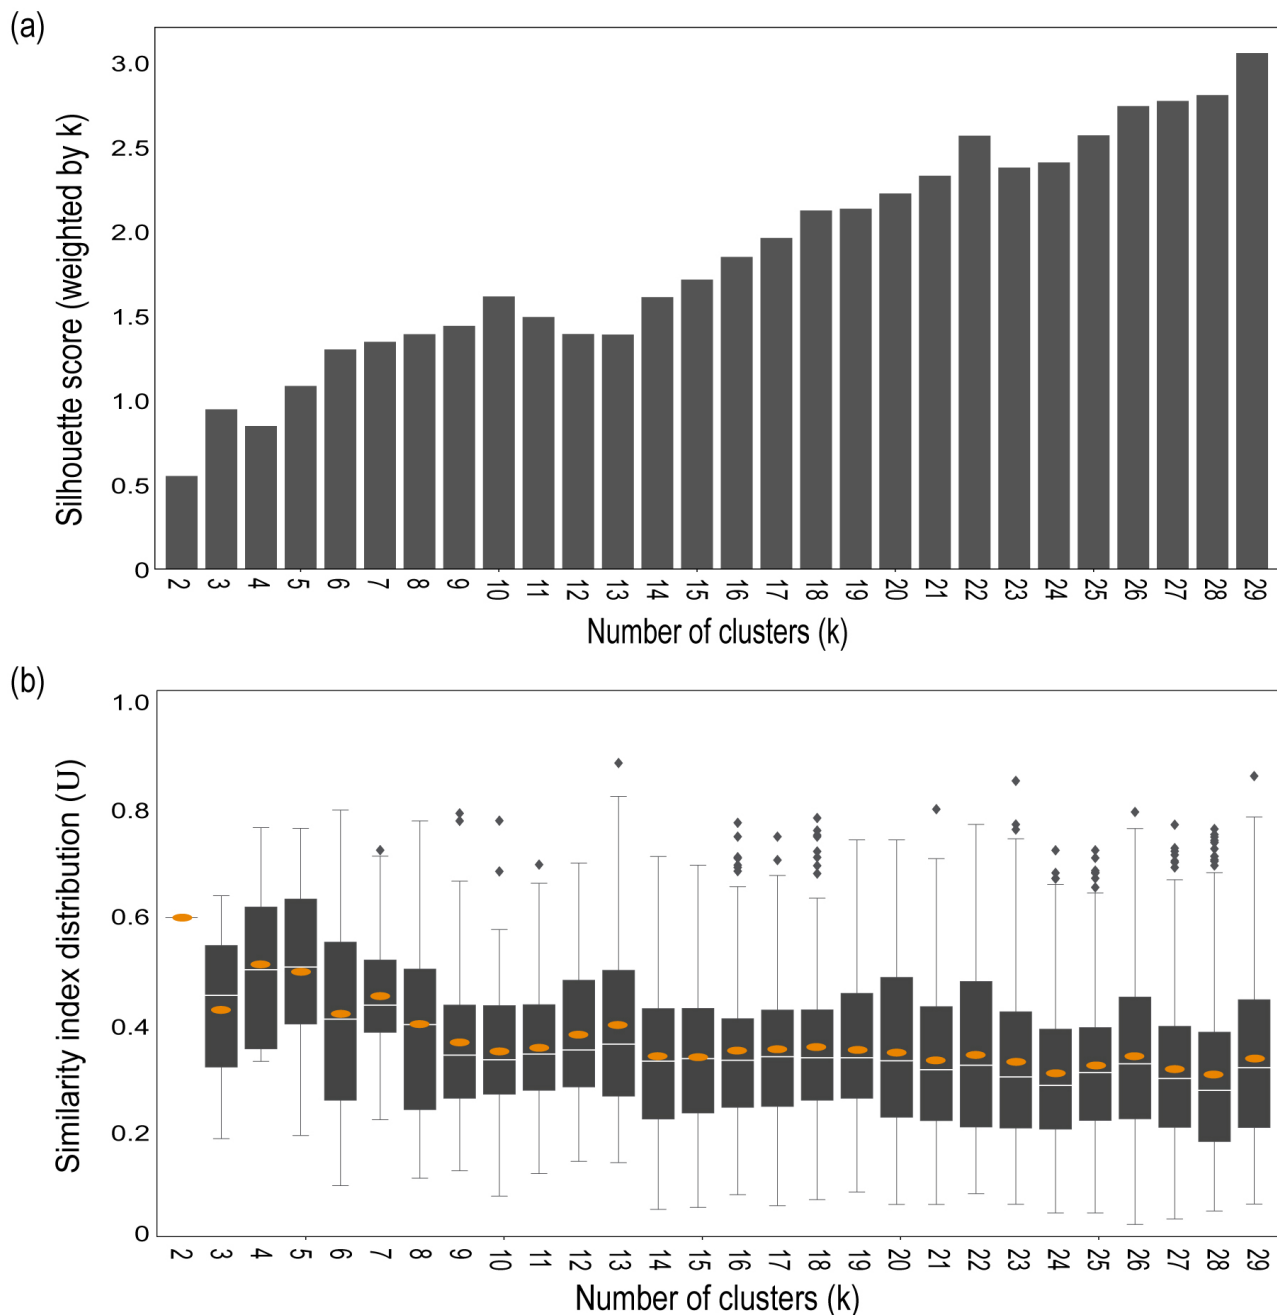

**Figure S3.** Similarity-based metrics for determining an optimized value of  $k$ . We provide results for the: (a) Silhouette test for the k-means++ application on the reference feature dataset, for  $k = 2$  to  $k = 29$ . The Silhouette score is computed as: average distance between each point within a cluster subtracted from the average distance between all clusters, divided by the maximum of the two averages. Reported here is the mean Silhouette score per  $k$ , weighted by  $k$ . (b) Cluster similarity ranges given by the Similarity Index ( $U$ ) from  $k=2$  to  $k=29$ . The range of  $U$  is defined as the similarity of event features in each cluster pair permutation per  $k$  (defined mathematically in Eq. S1). The symbols on this figure correspond to: orange ellipse, mean; white horizontal bar, median; bottom of rectangle, lower quartile; top of rectangle, upper quartile; bottom whisker, minimum; top whisker, maximum; diamond, outlier. We proceed to perform k-means++ with 10 clusters ( $k=10$ ).

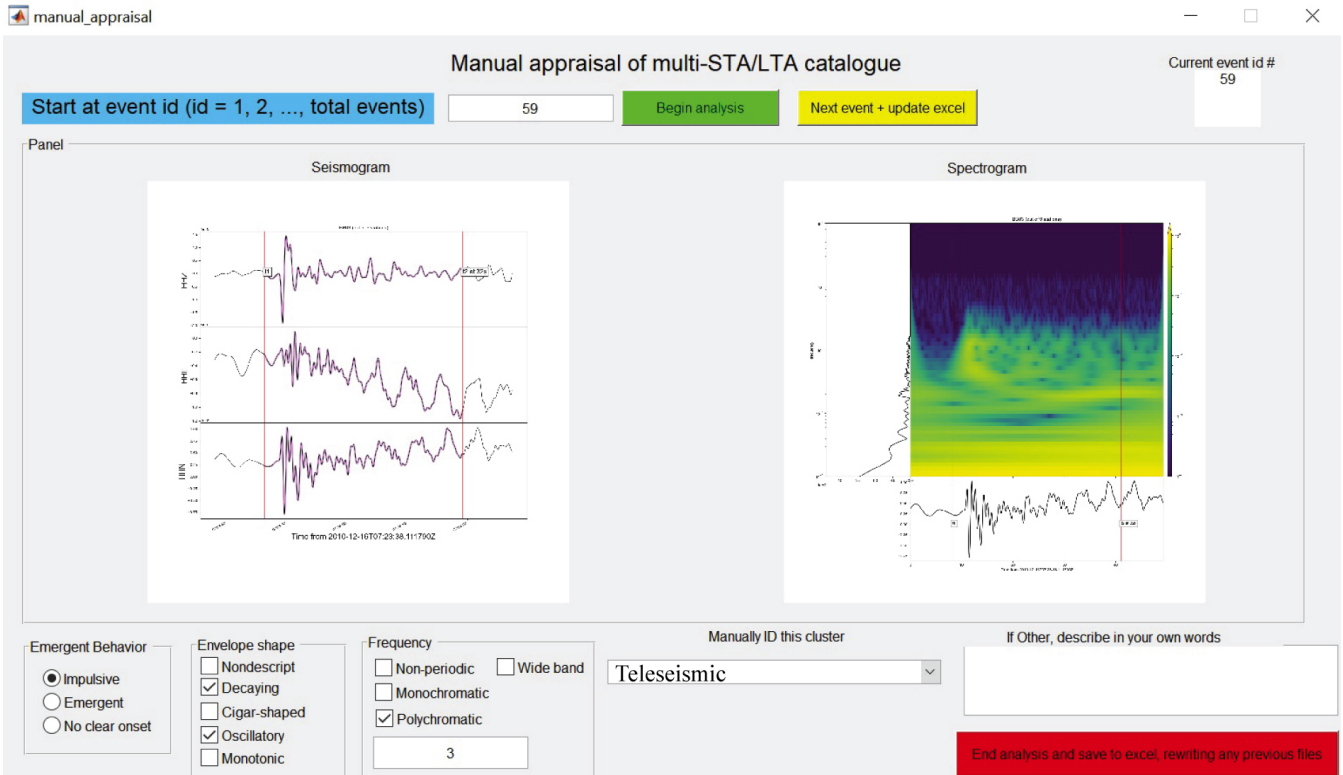

**Figure S4.** Screenshot of the manual appraisal GUI built and operated through MATLAB. The GUI is used to review the catalogue in terms of the waveform representation and the spectral representation. All fields are required for inputting detail on emergent behavior, envelope shape, frequency description, maximum frequency, and a manual identification of the type of event. Shown as an example is an impulsive event that decays after initial arrival and is oscillatory. The frequency is polychromatic and is at a maximum at 3 Hz. This event is grouped under the cluster of similar fracture-related events. The manual appraisal records user input to a spreadsheet.

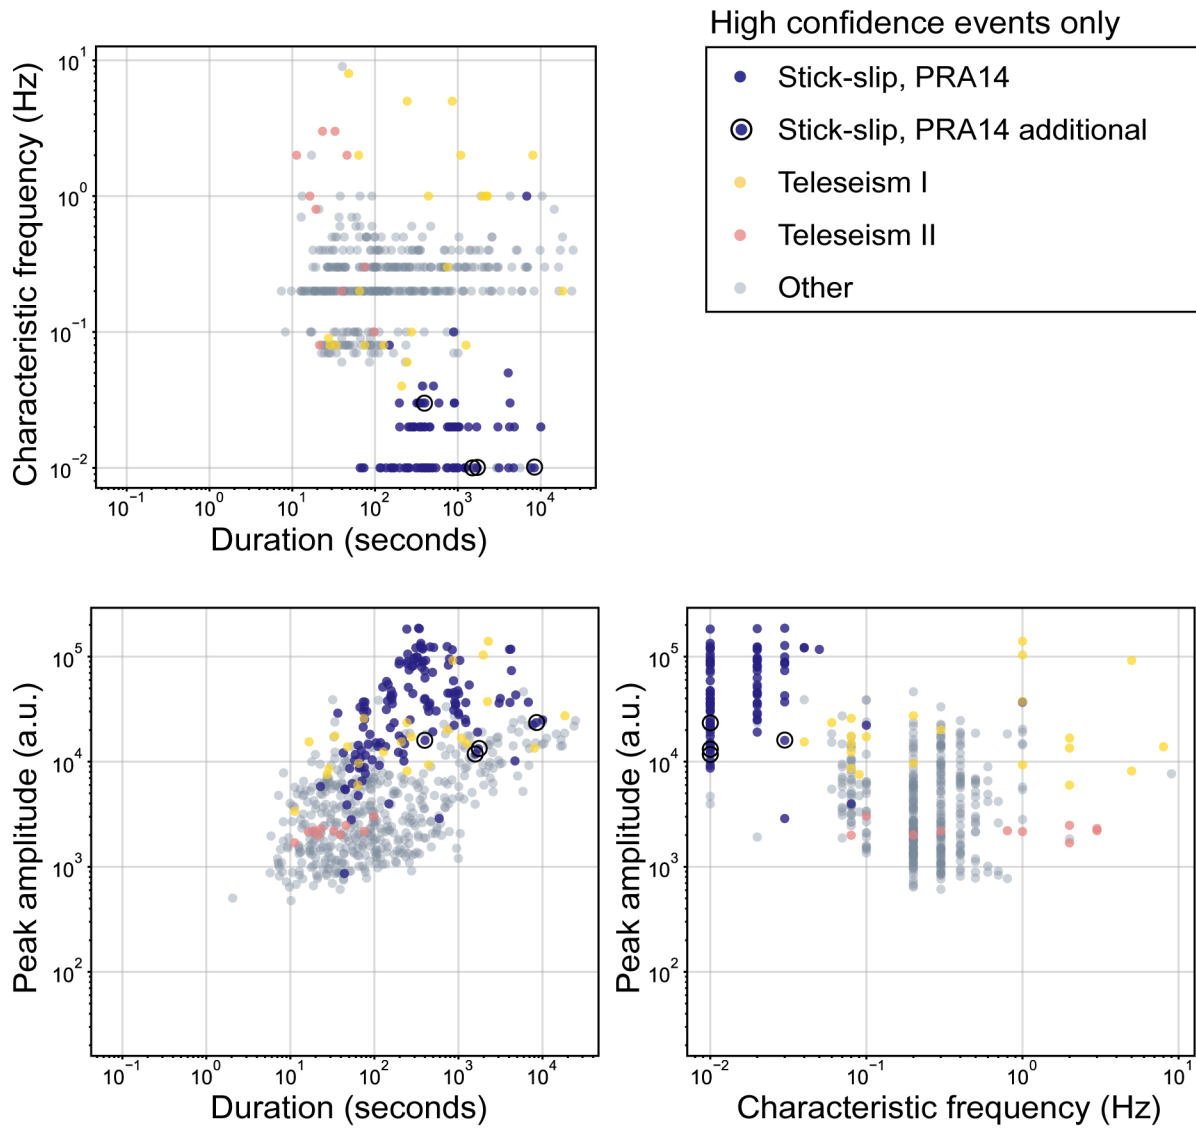

**Figure S5.** Manual appraisal of the reference event catalogue showing high confidence events only. The features measuring duration (log, seconds) and peak amplitude (log, a.u.) are retrieved from the reference event catalogue and characteristic frequency (log, Hz) is determined from the spectrograms of each event in the manual appraisal. Event types that are identified from the manual appraisal and further validated in subsequent investigation show the natural groupings, or clusters, of events in each bivariate feature pair.

Table S3: Summary of signal types expected from a cryoseismic deployment. Characteristic frequency, period, and duration are copied from the available literature, reported accurately within the expected orders of magnitude. Comments on waveform structures and expected sources taken from literature as well. ‘Potential’ refers to a potential for occurrence on the Whillans Ice Stream, i.e. the likelihood of each signal type to be observed from the Whillans Ice Stream deployment discussed in the text (Winberry et al., 2010), including three options: Unlikely, Possible, and Probable. Framework and sources reproduced from Podolskiy and Walter (2016).

| Signal type                | Freq. (Hz)  | Period (s)  | Duration   | Comment (based on the literature)                                                                                                                          | Potential |
|----------------------------|-------------|-------------|------------|------------------------------------------------------------------------------------------------------------------------------------------------------------|-----------|
| Basal icequakes            | 100         | 0.01        | 0.1s       | Impulsive first arrivals. (Helmstetter et al., 2015b)                                                                                                      | Probable  |
| Snowquakes                 | >50         | 0.02        | < 1 s      | Emerges with a sharp amplitude then exponential decay. Signals that show fracture in the uppermost snow cover due to thermal stress. (Nishio et al., 1983) | Possible  |
| Hydrofracture              | 10 – 100 Hz | 0.01 – 0.1  | 1 – 5 s    | Impulsive. (Hudson et al., 2020)                                                                                                                           | Probable  |
| Surface crevassing         | 10 – 50     | 0.1 – 0.02  | < 1 s      | Characterized by a dominant Rayleigh wave and few or no visible P- and S-phase arrivals. (Rösli et al., 2014)                                              | Probable  |
| Ice / serac falls          | 20          | 0.05        | 10 – 100 s | Complex frequency content that is characterized by various sub-events. (Roux et al., 2008)                                                                 | Unlikely  |
| Subglacial cavity cracking | 1 – 100     | 0.01 – 0.1  | 1 – 10 s   | Impulsive. (Walter et al., 2008)                                                                                                                           | Unlikely  |
| Crack propagation          | 12 – 15     | 0.06 – 0.08 | < 1 s      | Impulsive arrivals, repeating in multiplets, with rapid decay. (Carmichael et al., 2012)                                                                   | Possible  |
| Moulin tremor              | 3 – 11      | 0.09 – 0.33 | 6 hours    | Cigar-shaped envelope with no clear onsets or phase arrivals. (Rösli et al., 2014)                                                                         | Possible  |

|                            |                  |            |             |                                                                                                                                                |          |
|----------------------------|------------------|------------|-------------|------------------------------------------------------------------------------------------------------------------------------------------------|----------|
| Fluid-induced resonance    | 1 – 10           | 0.1 – 1    | 600 s       | Long, monochromatic, and harmonic seismic signals related to subglacial lake drainage. (Winberry et al., 2009a)                                | Possible |
| Firnquakes                 | 1 – 10           | 0.1 – 1    | < 1 s       | Rapid emergence then exponential decay in amplitude. (Lough et al., 2015)                                                                      | Unlikely |
| Fracture (thermal bending) | 10 – 15          | 0.06 – 0.1 | 1 – 5 s     | Short, impulsive in the evening. (Lombardi et al., 2019)                                                                                       | Probable |
| Calving                    | 1 – 3            | 0.33 – 1   | 25 – 600 s  | Characterized by emergent wave onsets and low frequencies. Range of duration depending on a trigger of rapid succession calving. (Qamar, 1988) | Unlikely |
| Iceberg resonance          | 0.5              | 2          | 60 – 3600 s | Iceberg harmonic tremor is described as a complex, evolving signal. (MacAyeal et al., 2008)                                                    | Unlikely |
| Local, regional swell      | $10^{-1}$        | 10         | 60 – 1200 s | Frequency dependence of arrival times at measurement seismometer based on distance and time from generation. (Hell et al., 2019)               | Unlikely |
| Secondary microseisms      | $10^{-1} – 10^0$ | 5 – 10     | 1–10 s      | Higher amplitude than primary microseisms. Can have a period less than 5 seconds when caused by wind. Cigar shaped. (Cannata et al., 2019)     | Possible |
| Micro-tsunamis             | $10^{-1}$        | 10 – 30    | 60 – 1800 s | Impulsive source mechanisms and short durations. (e.g. from iceberg collision; MacAyeal et al., 2009)                                          | Unlikely |
| Primary microseisms        | $10^{-1}$        | 10 – 25    | 10 s        | Spectral content equal to the ocean wave frequency. (Cannata et al., 2019; Anthony et al., 2015)                                               | Possible |

|                            |                     |            |            |                                                                                                                         |          |
|----------------------------|---------------------|------------|------------|-------------------------------------------------------------------------------------------------------------------------|----------|
| Glacier basal stick-slip   | $10^{-2}$           | 30 – 100   | < 1200 s   | Abrupt, initial rupture, typically composed of 3 phases over 20 – 30 minutes. (Pratt et al., 2014)                      | Likely   |
| Teleseismic glacial quakes | $10^{-2}$           | 35 – 100   | 10 – 100 s | Characteristic weak high-frequency excitation at the source and long propagation distances. (Nettles and Ekström, 2010) | Unlikely |
| Infragravity waves         | $10^{-3} - 10^{-2}$ | 100 – 1000 | 100 s      | Act at an ice shelf front. (Bromirski et al., 2015, 2017)                                                               | Unlikely |
| Seiches                    | $10^{-3} - 10^{-2}$ | 100 – 1000 | > 100 s    | Seiche frequency depends strongly on basin bathymetry. (Amundson et al., 2012)                                          | Unlikely |

---

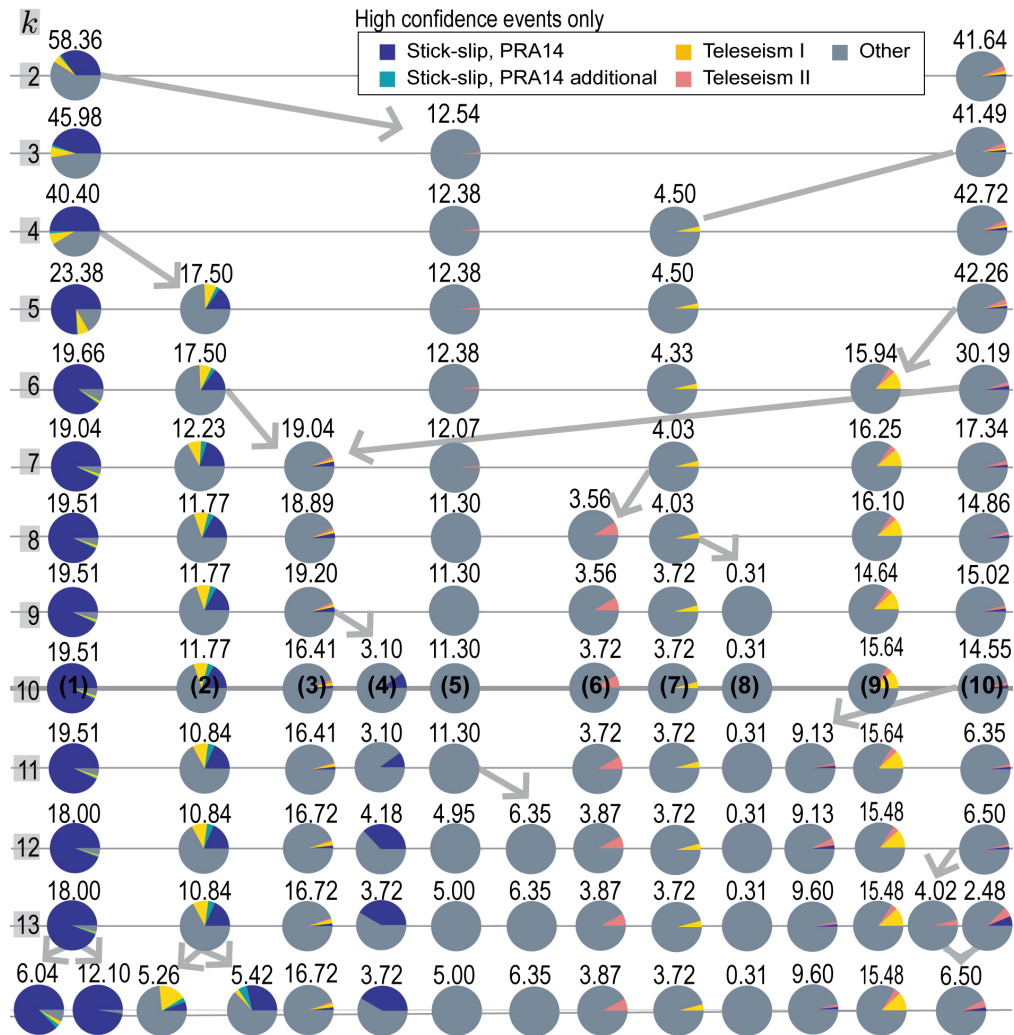

**Figure S6.** Illustration of how clusters (depicted as circles) evolve in composition from  $k=2$  (top row) to  $k=14$  (bottom row) for high confidence events only. As  $k$  increases (top to bottom), each column tracks an individual cluster and arrows indicate when a cluster splits or merges. The heavy grey line at  $k=10$  indicates the preferred value of  $k$ , along this row, cluster numbers are counted from left to right (1 to 10) and match those in Table 1 and Figures 6 and 7. The number above each cluster is the % of total events, thereby the numbers across a row sums to 100%. Pie chart segments represent the percentage of events within a cluster, as labelled with an event type during the manual appraisal. Clusters 3, 4, 6, 7, 8, 10 contain events best characterized as noise-types based on the majority labelled as ‘Other’ and their features (Sect 3). Clusters 1, 2, 5, and 9 contain either labelled events and/or noise that appears related to processes by further analysis. Event types as identified by manual appraisal are shown in the legend; further event types identified by unsupervised learning (Fig. 6) occur in Cluster 5 (events from an icequake swarm, lasting 2 days). The key differences are that the relative size of clusters is variable depending on how many low confidence events are associated with a given cluster. For example, Cluster 3 contains 9.16% of all events but 16.41% of high confidence events only. As another example, Cluster 8 contains 5.71% of all events but 0.31% of high confidence events only. This result emphasizes the level of legitimacy of a cluster’s contained events, which can streamline the way by which we investigate and interpret the more noise-dominated clusters in later discussion.

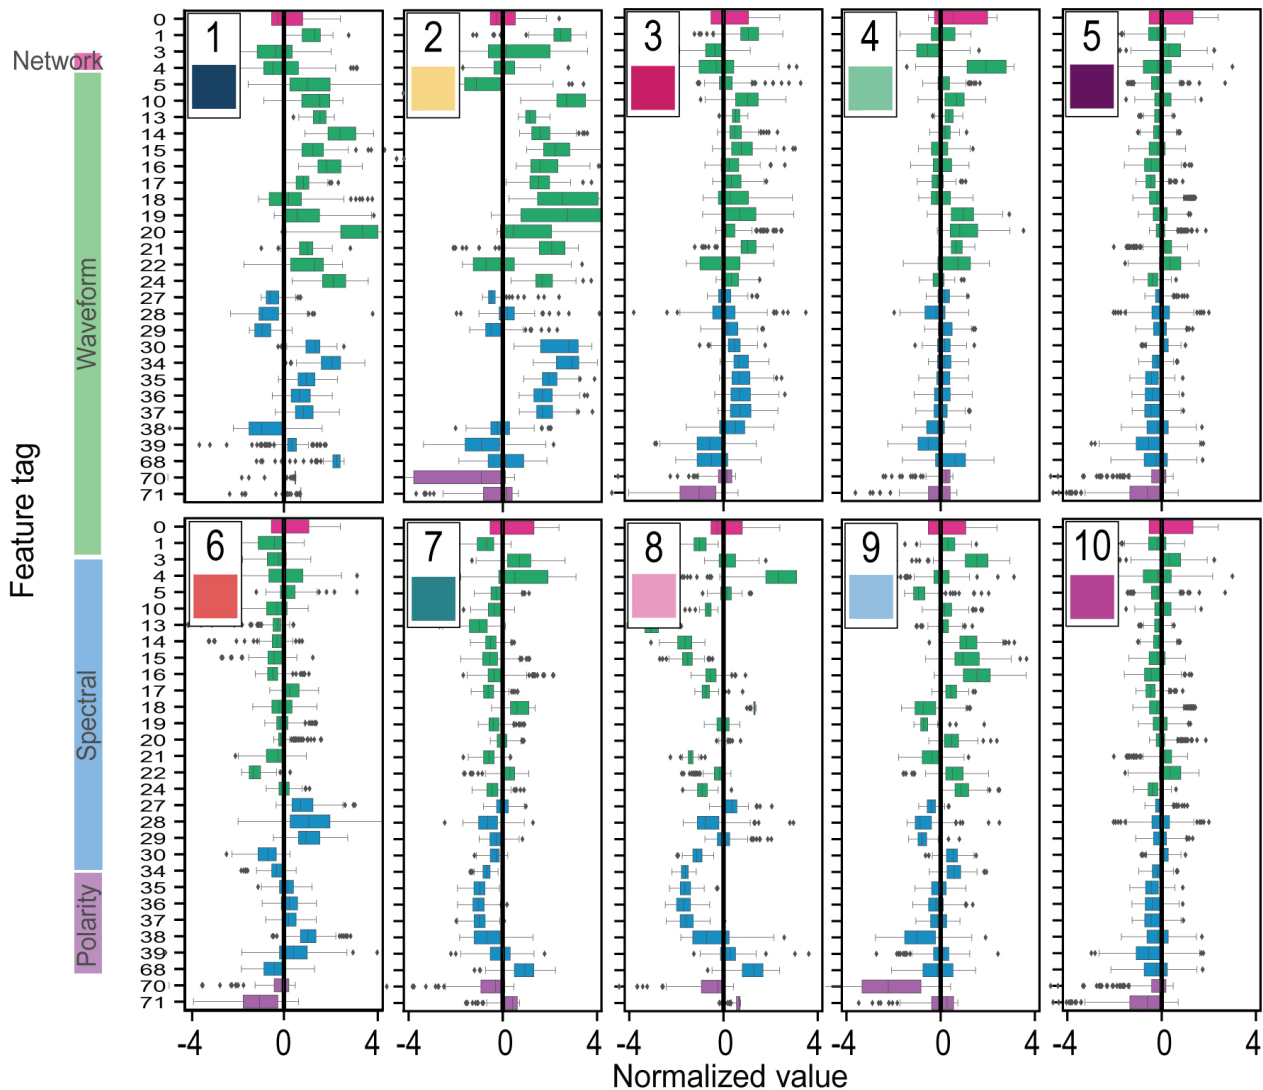

**Figure S7.** Distributions of features within each cluster for  $k = 10$ . Cluster number as assigned in main text is annotated in the top left of every plot. The feature tags and color attributions (top to bottom per figure: pink, green, blue, and purple) correspond to the numerical tag per feature and feature type provided in main text, Table 1. Since each feature is scaled before clustering to have the same median at zero, we can assume that clusters with features at medians farthest from zero are best differentiated from other clusters by those more extreme features. Therefore, we report the six features per cluster with the most extreme median values. This type of analysis is useful for comparing two clusters. For example, Clusters 1 and 2 are both assigned stick-slip events, so it is of interest to understand why all stick-slip events are not characteristic to one cluster. The feature distributions within each cluster may be informative, such as Cluster 1 being characterized by shorter event lengths (Fig. S5) whereas Cluster 2 is differentiated most from other clusters by longer event lengths.



Table S4: Reference for the spatial attribution discussed in main text, Table 1, and used to compile Fig. 6 in main text. Provided is the percentage of each cluster’s seismic events that are included in each cluster as detected by each seismometer.

| Cluster | 1            | 2            | 3            | 4           | 5            | 6            | 7           | 8           | 9            | 10           |
|---------|--------------|--------------|--------------|-------------|--------------|--------------|-------------|-------------|--------------|--------------|
| BB01    | 13.76        | 8.00         | 10.59        | <b>6.47</b> | <b>13.06</b> | 4.59         | <b>9.29</b> | 3.65        | 10.59        | 20.00        |
| BB03    | <b>30.02</b> | 12.11        | 8.47         | 4.36        | 5.81         | 3.39         | 7.02        | 2.18        | <b>14.53</b> | 12.11        |
| BB04    | <b>45.26</b> | 13.33        | 4.56         | 0.70        | 1.40         | 1.05         | 2.11        | 0.00        | <b>24.91</b> | 6.67         |
| BB06    | <b>28.40</b> | <b>18.93</b> | 9.05         | <b>7.00</b> | 4.12         | 2.88         | 5.76        | 1.65        | 10.29        | 11.93        |
| BB07    | 9.52         | 5.93         | 9.70         | <b>5.75</b> | 12.67        | <b>9.70</b>  | <b>8.36</b> | <b>4.76</b> | 8.45         | <b>25.16</b> |
| BB08    | 10.32        | 8.88         | <b>11.17</b> | 5.01        | 11.32        | 5.73         | 8.17        | 3.72        | 10.03        | <b>25.64</b> |
| BB10    | 13.15        | 5.80         | <b>12.11</b> | 4.55        | 4.14         | <b>9.52</b>  | <b>8.39</b> | <b>4.76</b> | 8.49         | <b>29.09</b> |
| BB11    | 18.41        | <b>13.52</b> | 8.86         | 2.56        | 5.83         | 8.16         | 6.53        | 3.73        | <b>16.55</b> | 15.85        |
| BB12    | 11.45        | 5.73         | 10.55        | 4.27        | <b>13.64</b> | <b>11.82</b> | 7.09        | <b>5.45</b> | 6.27         | 23.73        |
| BB13    | 8.93         | 8.05         | <b>10.82</b> | 2.77        | 6.67         | <b>10.82</b> | <b>9.69</b> | <b>5.41</b> | 9.56         | <b>27.30</b> |
| BB14    | <b>42.92</b> | <b>16.81</b> | 6.64         | 4.87        | 3.10         | 1.33         | 3.10        | 0.88        | 10.62        | 9.73         |
| BB15    | 17.27        | 8.49         | 10.50        | <b>7.63</b> | <b>19.71</b> | 3.02         | 5.90        | 1.87        | 10.36        | 15.25        |
| BB16    | 12.84        | 11.39        | 10.49        | 3.07        | <b>20.25</b> | 3.98         | 6.33        | 2.89        | 11.39        | 17.36        |
| BB17    | 20.91        | <b>17.27</b> | <b>12.73</b> | 4.55        | 5.45         | 3.64         | 4.24        | 2.42        | <b>18.79</b> | 10.00        |

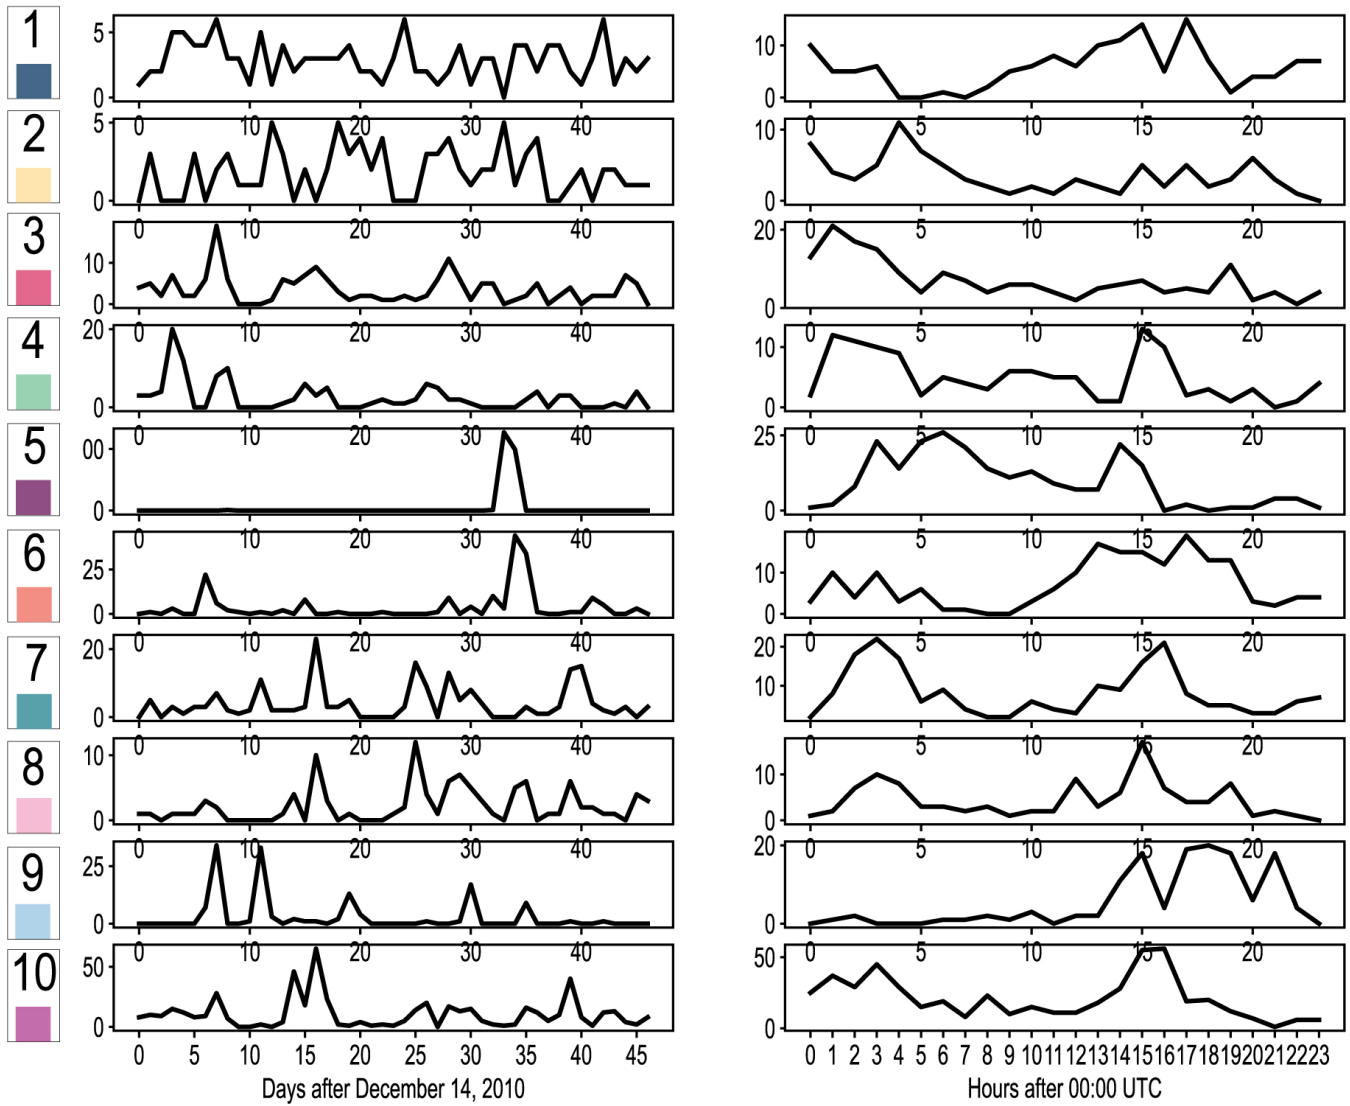

**Figure S8.** Reference for the temporal attribution discussed in main text, Table 1, and shown synthesized in main text, Fig. 6. Provided are the individual time series of each cluster’s seismic event count per day (left column) and per hour (right column).

## High confidence events only

### (a) Spatial attribution

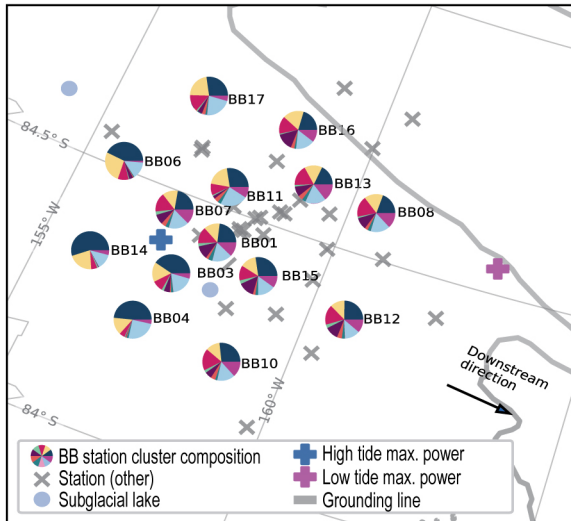

### Key:

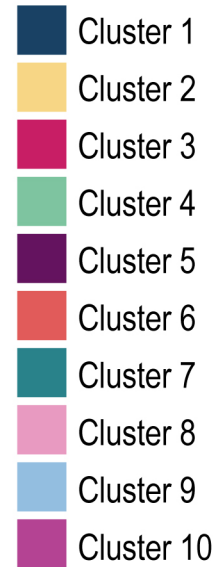

### (b) Temporal attribution

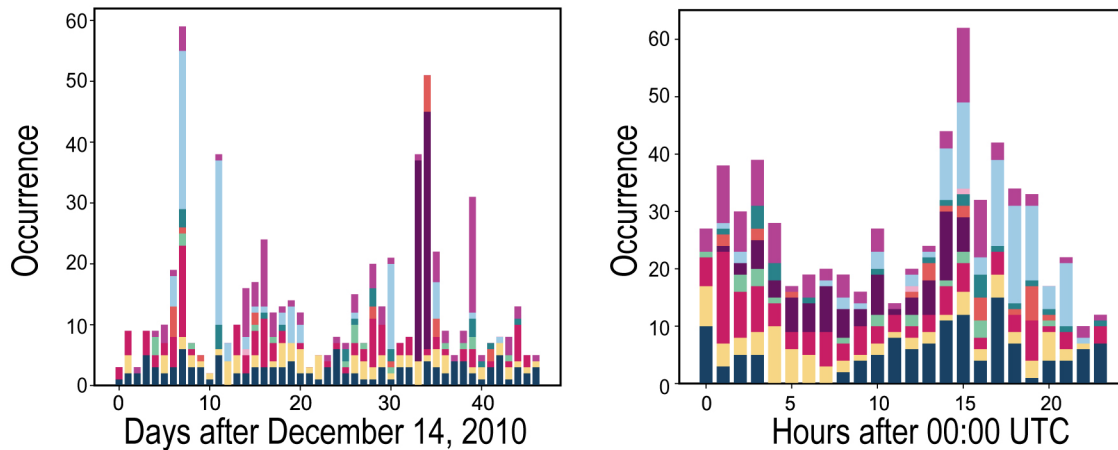

**Figure S9.** The (a) spatial and (b) temporal attribution of clusters for  $k=10$  showing high confidence events only. The spatial attribution pie chart segment colors corresponds to the numerical cluster assignments provided in the key. The temporal attribution is provided as a daily occurrence for days after December 14, 2010 and an hourly occurrence for hours after 00:00 UTC, where solar noon falls in the time zone of 22:00 UTC. In conjunction, both attributions are used to better characterize the clusters for  $k=10$ . The results of the spatio-temporal analysis are synthesized in Table 1. A breakdown for the spatial attribution and temporal attribution is provided in the Supplementary Materials (Table S4 and Fig. S8, respectively). Colors were chosen for clarity between separate classes (Glynn and Naylor, 2021, Ordnance Survey).

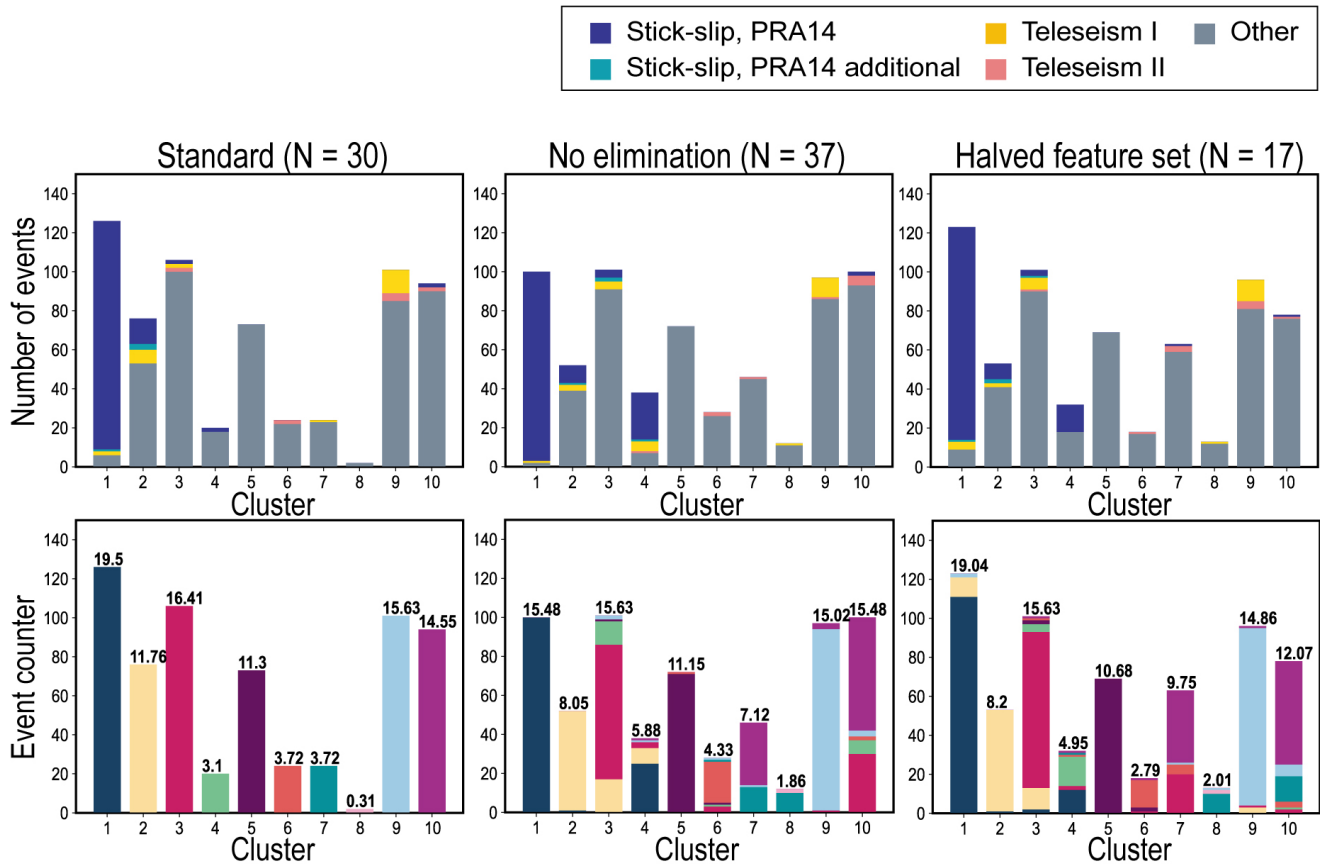

**Figure S10.** Stability of cluster results compared with the standard procedure showing high confidence events only. The left column shows the standard set of features after removal of selected members of the feature pairs with  $r \geq 0.95$ . The middle column shows the results of clustering with no features eliminated and the right column shows the results with a halved feature set. The top row provides the percentage composition of each cluster 1–10 as determined from the manual appraisal. The bottom row provides the number (and percentage) of events that are grouped in each cluster. The order and labelling of the clusters in the middle and right columns is manually decided by a comparative method that matches clusters approximately one-to-one for each application, when possible. The colors within each cluster in the bottom row signify where the contents of the clusters resulting from applying the algorithm to the standard feature are placed in the two comparison applications of the algorithm.

The clustering procedure has enabled an informative analysis of the clusters found with semi-supervised learning, described in detail in this section. The significance of the sign (i.e. positive or negative) of each discriminant feature per cluster (Table S5) is used here to describe the event types represented in each cluster. We review that the term 'platykurtic' is used to describe a distribution with less kurtosis than the normal distribution and is more typical for higher amplitude events (i.e. are of high strength) (Hibert et al., 2014).

Table S5: Explanations for most discriminant feature as most negative or most positive in a distribution. Useful for explanation of cluster seismic signal context in main text (Sect. 4).

| Feature | Negative                                                                           | Positive                                                                                | Citation                 |
|---------|------------------------------------------------------------------------------------|-----------------------------------------------------------------------------------------|--------------------------|
| 0       | N/A                                                                                | N/A                                                                                     |                          |
| 1       | Short duration                                                                     | Long duration                                                                           |                          |
| 3       | Low ratio signifies high strength event                                            | High ratio signifies low strength event                                                 | Hibert et al. (2014)     |
| 4       | More impulsive                                                                     | Slow emergence                                                                          | Hibert et al. (2014)     |
| 5       | Flatter amplitude distribution (platykurtic)<br>typical for higher strength events | Sharper distribution than the normal (leptokurtic)<br>are more common for ambient noise | Hibert et al. (2014)     |
| 10      | Higher signal to noise ratios                                                      | Tremor-like                                                                             | Langer et al. (2006)     |
| 13      | Low energy                                                                         | High energy                                                                             |                          |
| 14      | Low energy                                                                         | High energy                                                                             |                          |
| 15      | Low energy                                                                         | High energy                                                                             |                          |
| 16      | Low energy                                                                         | High energy                                                                             |                          |
| 17      | Low energy                                                                         | High energy                                                                             |                          |
| 18      | Low energy in flatter distribution                                                 | High energy in sharper distribution                                                     |                          |
| 19      | Low energy in flatter distribution                                                 | High energy in sharper distribution                                                     |                          |
| 20      | Low energy in flatter distribution                                                 | High energy in sharper distribution                                                     |                          |
| 21      | Low energy in flatter distribution                                                 | High energy in sharper distribution                                                     |                          |
| 22      | Low energy in flatter distribution                                                 | High energy in sharper distribution                                                     |                          |
| 24      | Low frequency content                                                              | High frequency content                                                                  |                          |
| 27      | Low frequency of <25% power                                                        | High frequency of <25% power                                                            |                          |
| 28      | Low frequency of median power                                                      | High frequency of median power                                                          |                          |
| 29      | Low frequency content                                                              | High frequency content                                                                  |                          |
| 30      | Low variance in frequency content                                                  | High variance in frequency content                                                      |                          |
| 34      | Low energy in frequency band                                                       | High energy in frequency band                                                           |                          |
| 35      | Low energy in frequency band                                                       | High energy in frequency band                                                           |                          |
| 36      | Low energy in frequency band                                                       | High energy in frequency band                                                           |                          |
| 37      | Low energy in frequency band                                                       | High energy in frequency band                                                           |                          |
| 38      | Low weighted mean of the frequencies                                               | High weighted mean of the frequencies                                                   |                          |
| 39      | Narrow fracture                                                                    | Wide fracture                                                                           | Sayers and Calvez (2010) |
| 68      | No preferred direction                                                             | Linear polarization                                                                     | Hammer et al. (2012)     |
| 70      | Propagating more from horizontal plane                                             | Propogating more from vertical plane                                                    | Hammer et al. (2012)     |



Table S6: Cluster attribution for  $k = 10$ . Descriptions of the active glacier process or noise events and how the cluster attribution is determined, such as by unsupervised learning (UL).

| Cluster | Process event name (if distinct) | Noise event description            | Process interpretation (proposed)                          | Further remarks                                                                                                                                                 | Comment, including processes not likely                                                                                       |
|---------|----------------------------------|------------------------------------|------------------------------------------------------------|-----------------------------------------------------------------------------------------------------------------------------------------------------------------|-------------------------------------------------------------------------------------------------------------------------------|
| 1       | Stick-slip                       |                                    | High-energy, source near sticky spot.                      |                                                                                                                                                                 | Stick-slip events matched to previous studies.                                                                                |
| 2       | Stick-slip, Teleseismic          |                                    | Long, high-energy.                                         |                                                                                                                                                                 | Stick-slip events matched to previous studies, some newly identified by UL. Teleseismic events verified by global catalogues. |
| 3       |                                  | High-energy, long, tremor-like     | External wavefield?                                        |                                                                                                                                                                 | Identified by UL                                                                                                              |
| 4       |                                  | High-energy, emergent, tremor-like | External wavefield?                                        |                                                                                                                                                                 | Identified by UL                                                                                                              |
| 5       | Event swarm                      |                                    | External swarm of high-freq. fractures from Jan. 16 to 17. | Potential cause can be melt on RIS. Similar Jan. 10–16, 2016 RIS icequake swarm attributed to melt-driven fracture (Chaput et al., 2018; Jenkins et al., 2021). | Identified by UL. Swell and ocean infragravity wave causes unlikely due to limited time span.                                 |
| 6       |                                  | Low-energy, high-freq. content     | External wavefield?                                        | Temporal correlation with event swarm (Cluster 5).                                                                                                              | Identified by UL.                                                                                                             |
| 7       |                                  | Low-energy                         | External wavefield?                                        |                                                                                                                                                                 | Identified by UL.                                                                                                             |
| 8       |                                  | Low-energy, emergent               | External wavefield?                                        |                                                                                                                                                                 | Identified by UL.                                                                                                             |
| 9       | Teleseismic                      |                                    | Global earthquakes and other high energy events.           | Other high energy events occur in the 14 to 21 UTC window. Potential sources are external wavefield fractures.                                                  | Identified in manual appraisal, also identified by UL.                                                                        |
| 10      |                                  | Low-energy                         | External wavefield?                                        | Cluster evolution from $k=2$ to $k=14$ indicates high variability in the character of events.                                                                   | Identified by UL.                                                                                                             |

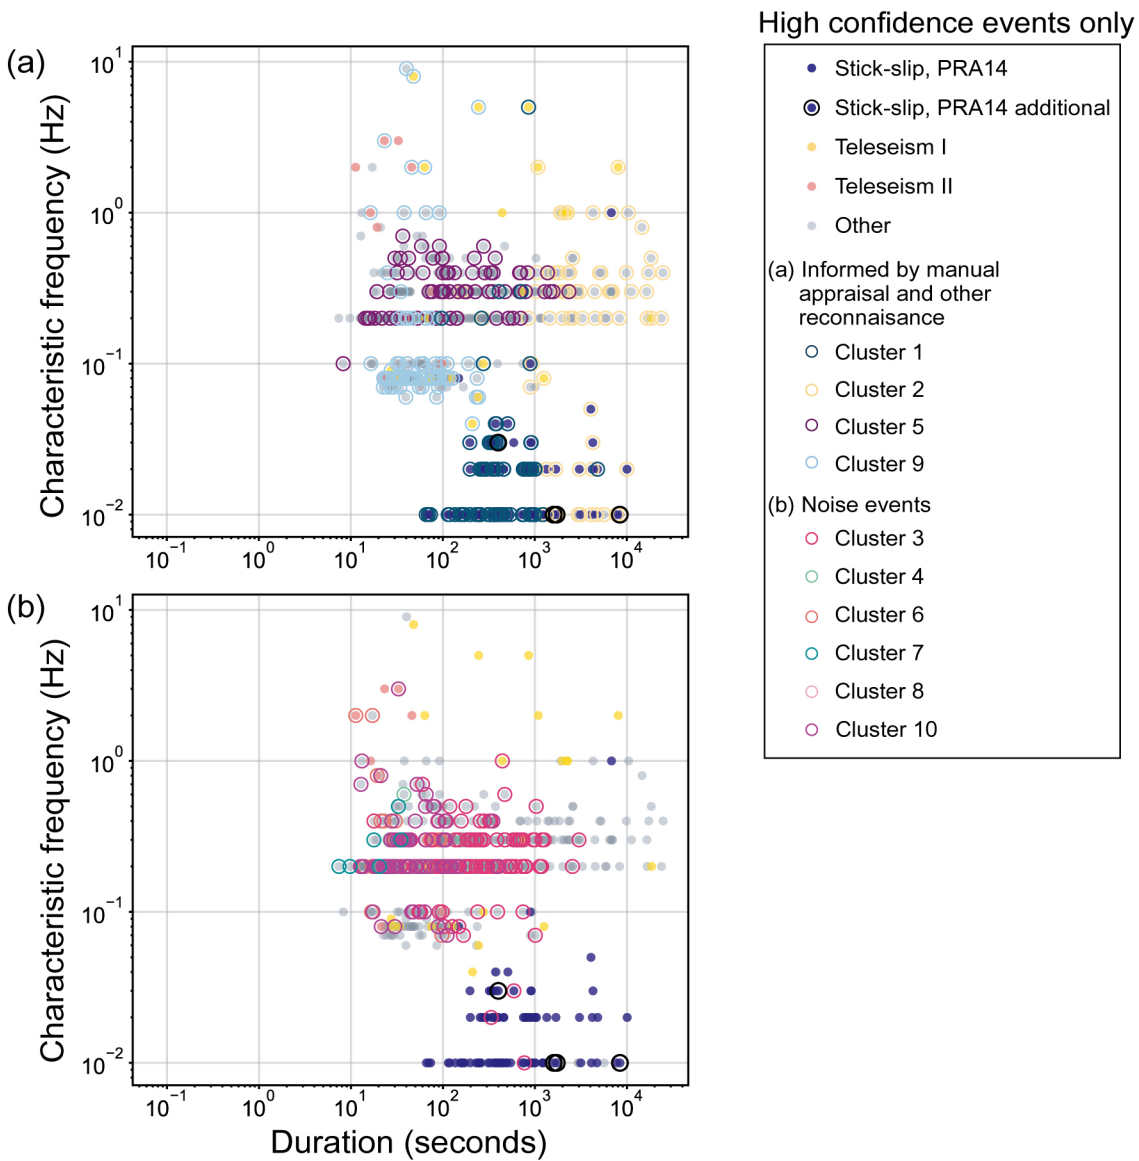

**Figure S11.** Synthesis of the Whillans Ice Stream duration and frequency relationships by manually identified event types and unsupervised learning clusters showing high confidence events only. For the manually identified events, as labelled from the thesis research, are designated by filled circles. The clusters are shown in the two plots as (a) Clusters informed by manual appraisal and other reconnaissance, including Cluster 1 (stick-slip), Cluster 2 (stick-slip), Cluster 5 (potentially icequake swarm), and Cluster 9 (teleseismic and potentially external fracture-related), (b) Clusters likely pertaining to noise-type events, including Clusters 3, 4, 6, 7, and 8. Some event types can be concealed by other symbols; the events of type ‘Other’ and other manually identified events are arranged in the background, such that the unsupervised learning result is in the foreground.
